# Supplementary material for: Synthesis of a graphene oxide/sodium silicate nanocomposite using sodium silicate solution
Source: Royal Society of Chemistry journal article supplement (doi:10.1039/c5ra05241f), 2015-01-01
Supplement: c5ra05241f1.pdf [file c5ra05241f1.pdf]

## Electronic Supplementary Information

# Synthesis of graphene oxide/sodium silicate nanocomposite using sodium silicate solution†

Jin Seok Choi, Hyun-Kwun Lee, Sung Jin An\*

Department of Materials Science and Engineering, Kumoh National Institute of Technology, 61 Daehak-ro, Gumi, 730-701, Korea

\* E-mail: sungjinan@kumoh.ac.kr

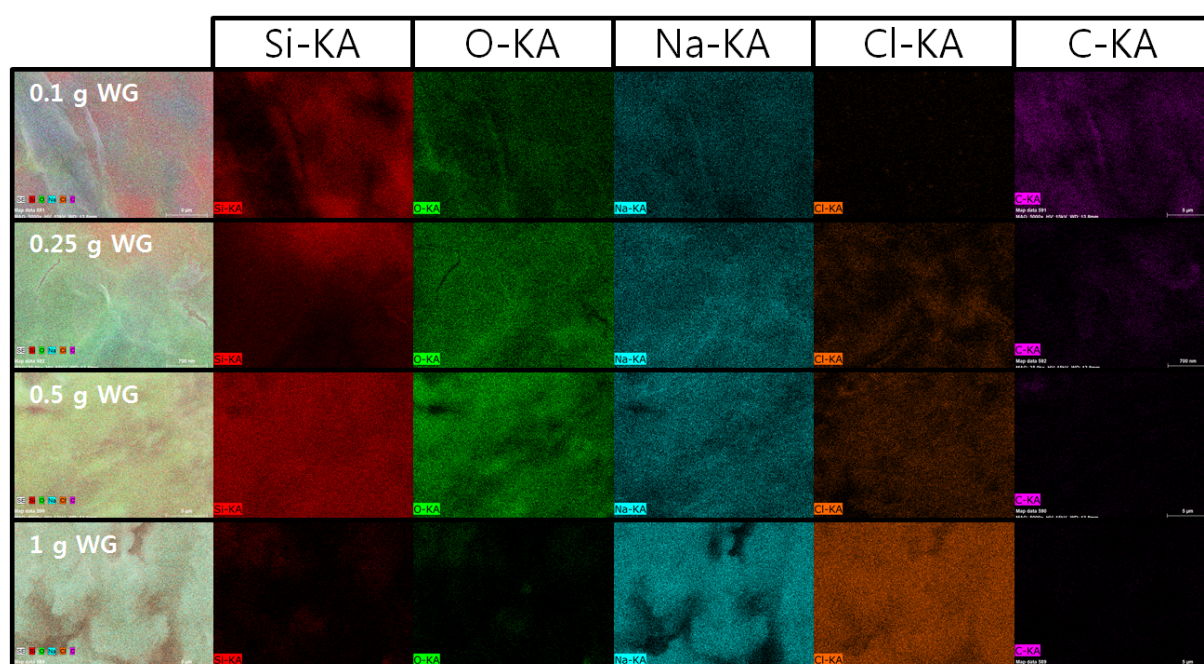

**Fig. S1.** SEM-EDS elements map images of rG-O/Na<sub>2</sub>SiO<sub>3</sub> nanocomposites prepared with different concentrations of WG.

| <b>WG<br/>Weight</b> | <b>Si [wt%]</b> | <b>O [wt%]</b> | <b>Na [wt%]</b> | <b>Cl [wt%]</b> | <b>C [wt%]</b> |
|----------------------|-----------------|----------------|-----------------|-----------------|----------------|
| 1 g                  | -               | 1.73           | 37.74           | 60.54           | -              |
| 0.5 g                | 20.41           | 44.65          | 18.45           | 12.20           | 4.29           |
| 0.25 g               | 24.36           | 43.99          | 16.46           | 8.39            | 6.79           |
| 0.1 g                | 24.89           | 20.16          | 6.01            | -               | 49.94          |

**Table S1.** Quantitative analysis by EDS point analysis of rG-O/Na<sub>2</sub>SiO<sub>3</sub> nanocomposites prepared using different weights of WG.

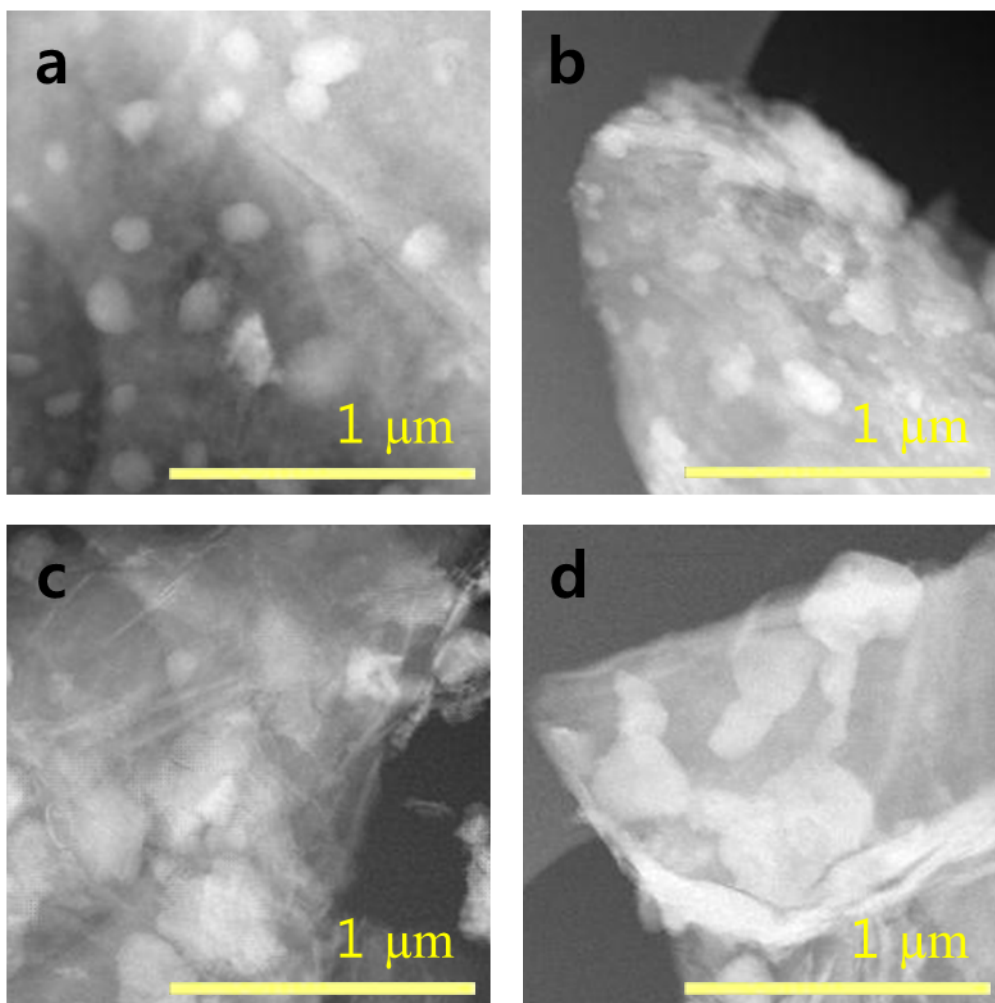

**Fig. S2.** STEM images of rG-O/Na<sub>2</sub>SiO<sub>3</sub> nanocomposites prepared with different concentrations of WG (a) 0.1, (b) 0.25, (c) 0.5, and (d) 1 g, respectively.

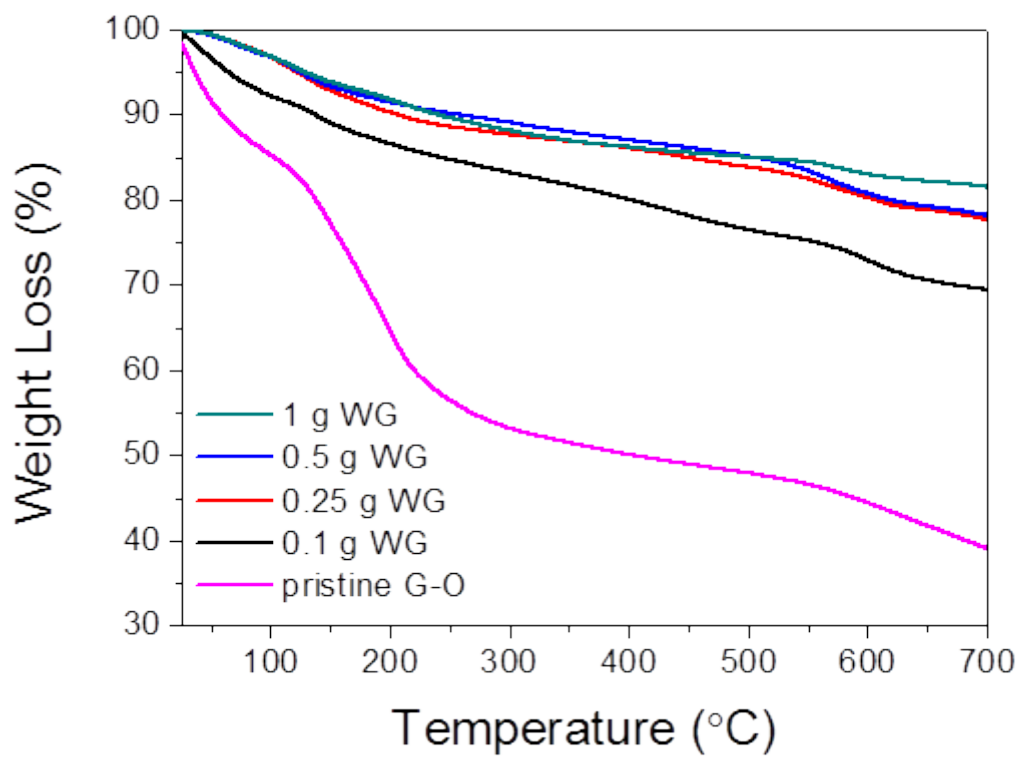

**Fig. S3.** TGA curves of pristine G-O and G-O/ $\text{Na}_2\text{SiO}_3$  nanocomposites prepared with different concentrations of WG.
